# Supplementary material for: Coordination polymer-based supercapacitors with matched energy levels: enhanced capacity under visible light illumination in the presence of methanol
Source: Royal Society of Chemistry journal article supplement (doi:10.1039/c8dt02166j), 2018-01-01
Supplement: c8dt02166j1.pdf [file c8dt02166j1.pdf]

# Coordination polymer-based supercapacitor with matched energy levels: enhanced capacity under visible light illumination in the presence of methanol

Hong an Tang,<sup>a</sup> Miao Miao Zhang,<sup>a</sup> Yun Gong<sup>\*a</sup> and Jian Hua Lin<sup>\*a,b</sup>

<sup>a</sup>College of Chemistry and Chemical Engineering, Chongqing University, Chongqing 401331, P. R. China Tel: +86-023-65678932 E-mail: gongyun7211@cqu.edu.cn

<sup>b</sup>State Key Laboratory of Rare Earth Materials Chemistry and Applications, College of Chemistry and Molecular Engineering, Peking University, Beijing 100871, P. R. China Tel: +86-010-62753541 E-mail: jhlin@pku.edu.cn

**Table S1** Selected bond lengths (Å) and angles (°) for CPs **1** and **2**

| CP 1                |            |                   |            |
|---------------------|------------|-------------------|------------|
| Cu(1)-O(1)#1        | 1.962(4)   | Cu(1)-N(5)#1      | 1.990(5)   |
| Mo(1)-O(1)          | 1.757(4)   | Mo(2)-O(9)#2      | 2.426(4)   |
| Mo(4)-O(12)         | 1.678(4)   | O(1)-Cu(1)-N(5)   | 91.23(19)  |
| O(1) -Cu(1)-O(1) #1 | 180.00(9)  | N(5)#1-Cu(1)-N(5) | 180.00(12) |
| O(1)#1-Cu(1)-N(5)   | 88.77(19)  | O(11)-Mo(2)-O(4)  | 156.58(17) |
| O(4)-Mo(1)-O(8)     | 69.37(15)  | Mo(3)-O(8)-Mo(1)  | 90.16(14)  |
| O(10)-Mo(2)-O(9)#2  | 178.99(18) | Mo(4)-O(13)-Mo(3) | 114.34(19) |
| Mo(4)#2-O(4)-Mo(1)  | 146.8(2)   |                   |            |
| CP 2                |            |                   |            |
| Cu(1)-N(1)          | 1.978(10)  | Cu(1)-N(2)        | 1.987(10)  |
| Cu(1)-O(45)         | 1.916(8)   | Cu(1)-O(57)       | 1.963(9)   |
| Cu(1)-O(32)         | 2.701(9)   | Cu(2)-O(41)       | 1.959(8)   |
| Cu(2)-O(59)         | 1.960(8)   | Cu(2)-O(58)       | 2.278(9)   |
| Cu(2)-N(6)          | 1.997(9)   | Cu(2)-N(5)        | 1.996(9)   |
| Cu(3)-O(49)         | 1.938(8)   | Cu(3)-O(51)       | 1.936(9)   |
| Cu(3)-N(4)          | 1.974(11)  | Cu(3)-N(3)        | 1.987(9)   |
| Cu(4)-O(60)         | 1.991(9)   | Cu(4)-O(61)       | 2.235(9)   |
| Cu(4)-N(8)          | 1.974(10)  | Cu(4)-N(7)        | 1.989(10)  |
| O(45)-Cu(1)-O(57)   | 92.5(4)    | O(57)-Cu(1)-O(32) | 112.1(4)   |
| N(1)-Cu(1)-N(2)     | 82.6(4)    | O(45)-Cu(1)-N(1)  | 172.0(4)   |

|                   |          |                   |          |
|-------------------|----------|-------------------|----------|
| N(2)-Cu(1)-O(32)  | 77.8(3)  | O(59)-Cu(2)-O(58) | 92.6(3)  |
| O(59)-Cu(2)-N(5)  | 170.6(4) | O(41)-Cu(2)-N(5)  | 91.5(4)  |
| N(5)-Cu(2)-N(6)   | 80.0(4)  | O(51)-Cu(3)-O(49) | 88.9(4)  |
| O(49)-Cu(3)-N(4)  | 96.3(4)  | N(3)-Cu(3)-O(51)  | 93.5(4)  |
| O(49)-Cu(3)-N(3)  | 175.4(4) | N(4)-Cu(3)-N(3)   | 81.7(4)  |
| O(43)-Cu(4)-O(60) | 92.7(3)  | N(8)-Cu(4)-N(7)   | 81.3(4)  |
| O(61)-Cu(4)-N(7)  | 91.0(4)  | O(43)-Cu(4)-N(7)  | 170.0(4) |

Symmetry transformations used to generate equivalent atoms:

#1 -x+1,-y+1,-z; #2 -x+2,-y+2,-z;

**Table S2** Distances (Å) and angles (°) of the selected intermolecular H bonds in CP 2

| D   | H    | A     | D-H  | D···A distance | H···A distance | ∠D-H···A |
|-----|------|-------|------|----------------|----------------|----------|
| O58 | H58C | O64#1 | 0.85 | 2.929(15)      | 2.08           | 172      |
| O60 | H60B | O68#2 | 0.85 | 2.810(13)      | 1.99           | 161      |
| O61 | H61C | O40#3 | 0.85 | 2.943(12)      | 2.12           | 162      |
| O61 | H61D | O61#3 | 0.85 | 3.161(15)      | 2.34           | 162      |
| O63 | H63C | O35#4 | 0.85 | 3.075(18)      | 2.31           | 150      |
| O63 | H63D | O48#5 | 0.85 | 3.137(18)      | 2.36           | 151      |
| O64 | H64C | O63   | 0.85 | 2.72(2)        | 1.88           | 168      |
| O64 | H64D | O65#5 | 0.85 | 2.881(19)      | 2.05           | 167      |
| O66 | H66E | O53#6 | 0.85 | 2.55(3)        | 1.74           | 159      |
| O66 | H66F | O55#6 | 0.85 | 2.36(2)        | 1.56           | 157      |
| O67 | H67C | O27#6 | 0.85 | 2.937(14)      | 2.12           | 160      |
| O67 | H67D | O44#7 | 0.85 | 2.998(14)      | 2.19           | 160      |
| O68 | H68C | O26#6 | 0.85 | 2.925(13)      | 2.09           | 168      |
| O68 | H68D | O67   | 0.85 | 2.782(16)      | 1.95           | 168      |

Symmetry transformations used to generate the equivalent atoms:

#1 -x+2, -y+1, -z+1; #2 x+1, y, z; #3 -x+2, -y+1, -z; #4 -x+1, -y, -z+1; #5 -x+1, -y+1, -z+1; #6 -x+1, -y+1, -z; #7 x-1, y, z.

**(a)**

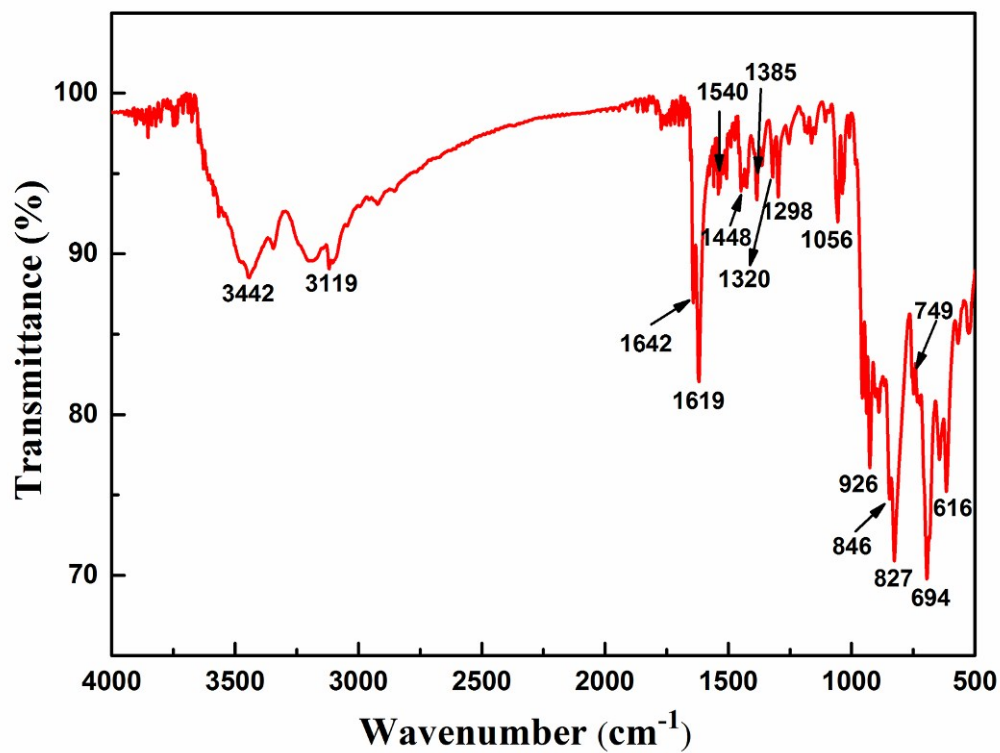

(b)

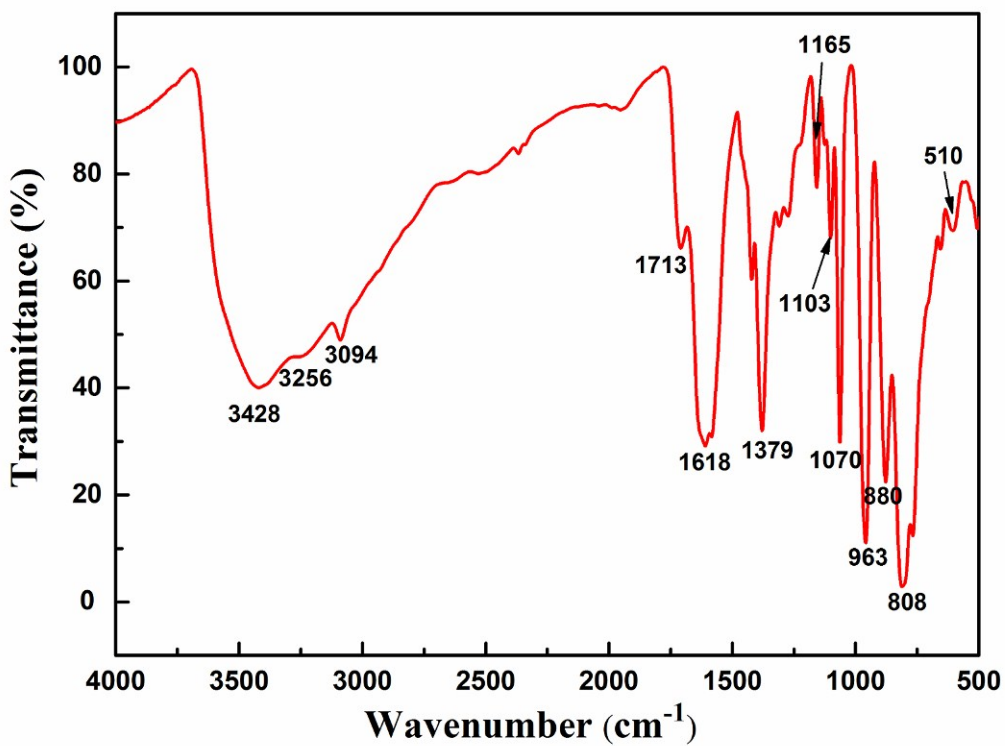

Fig. S1 IR spectra of CPs 1 (a) and 2 (b).

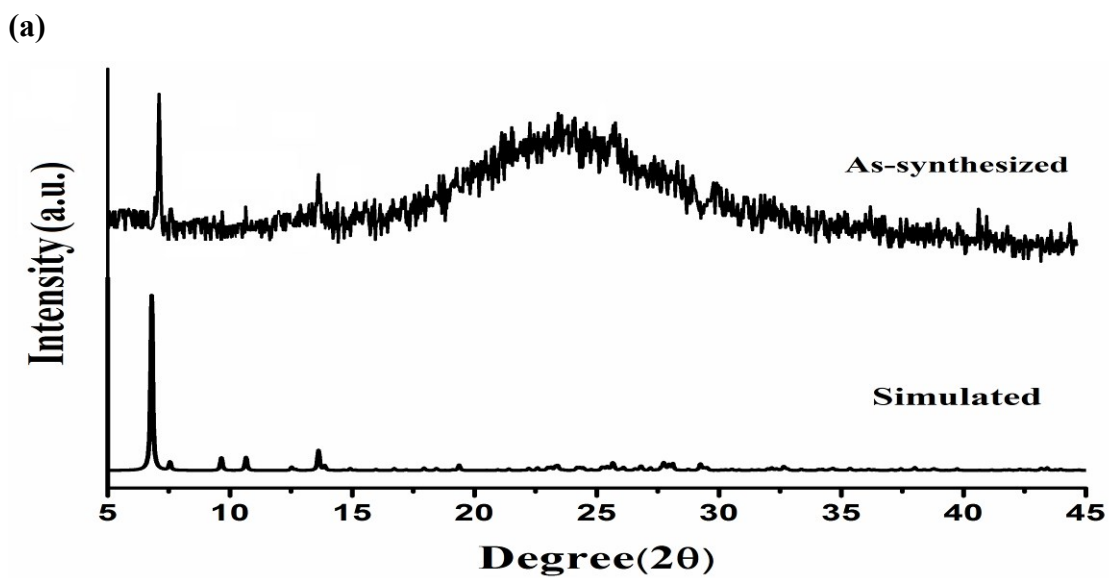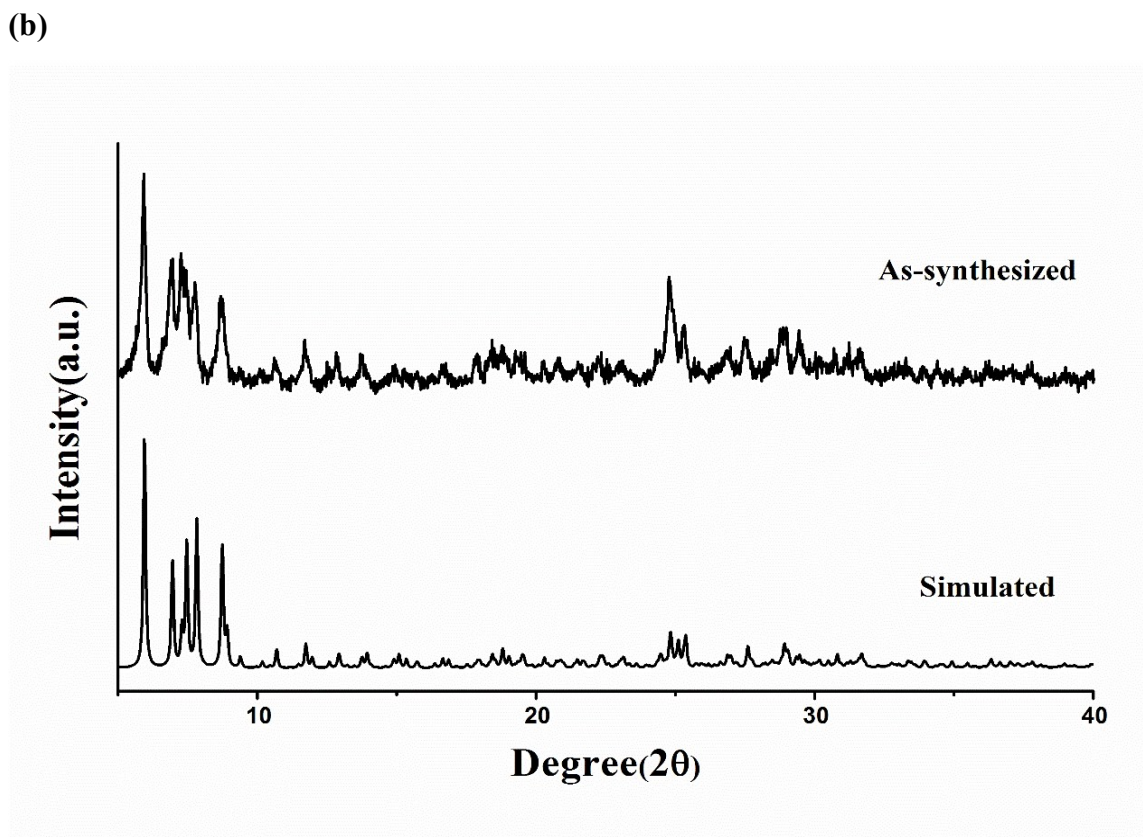

Fig. S2 The PXRD patterns of CPs 1 (a) and 2 (b).

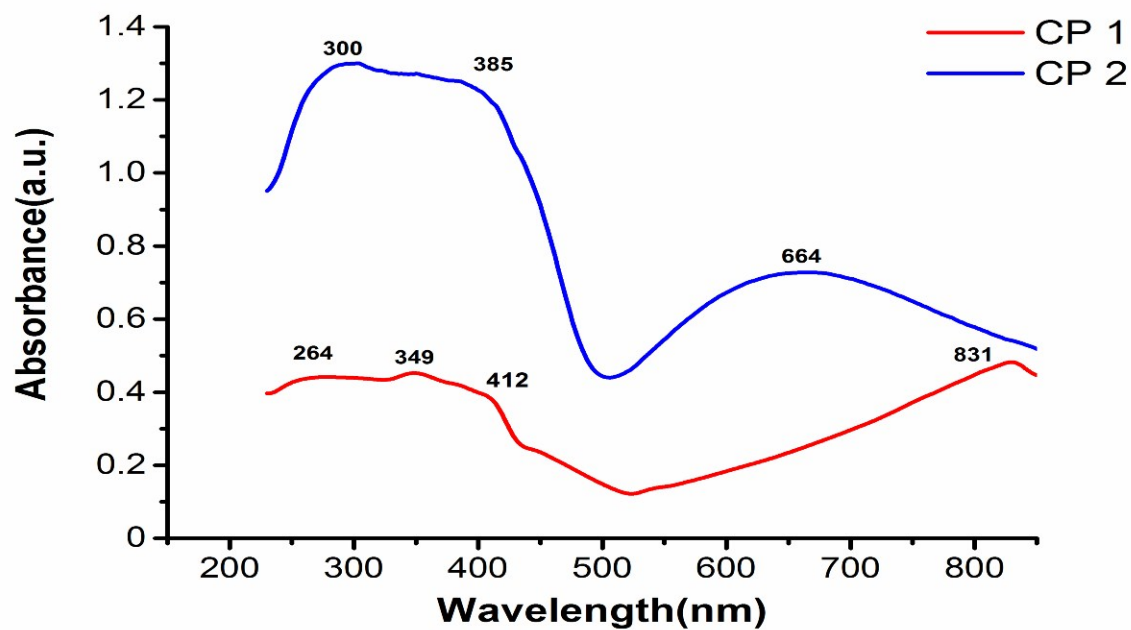

Fig. S3 UV-vis absorption spectra at room temperature for CPs 1 (red) and 2 (blue).

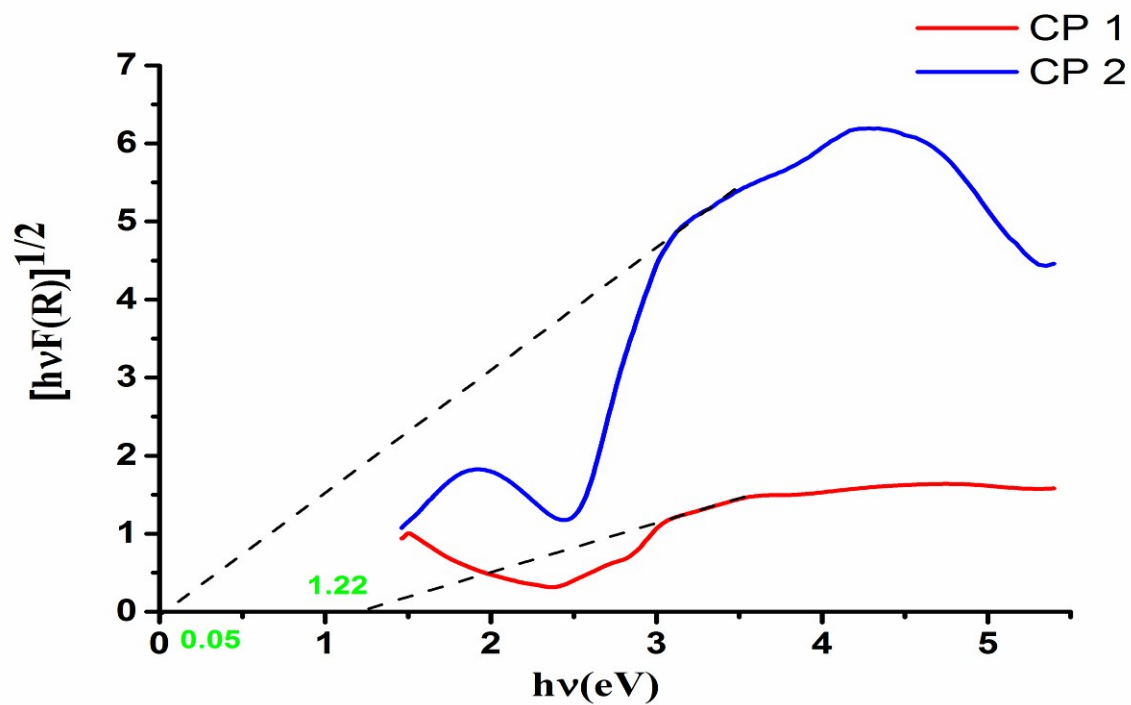

Fig. S4 The diffuse reflectance spectra (DRS) for CPs 1 and 2 in the transformed Kubelka–Munk functions.

(a)

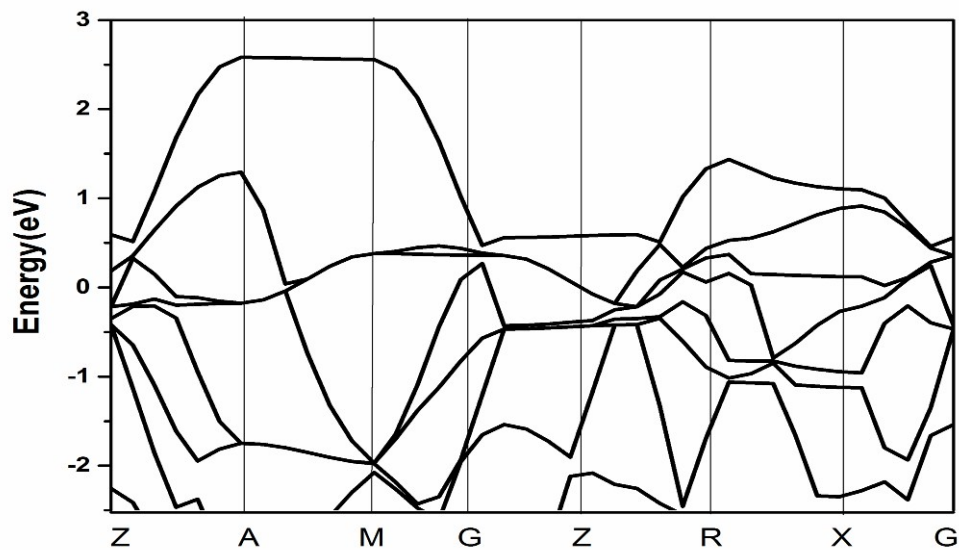

(b)

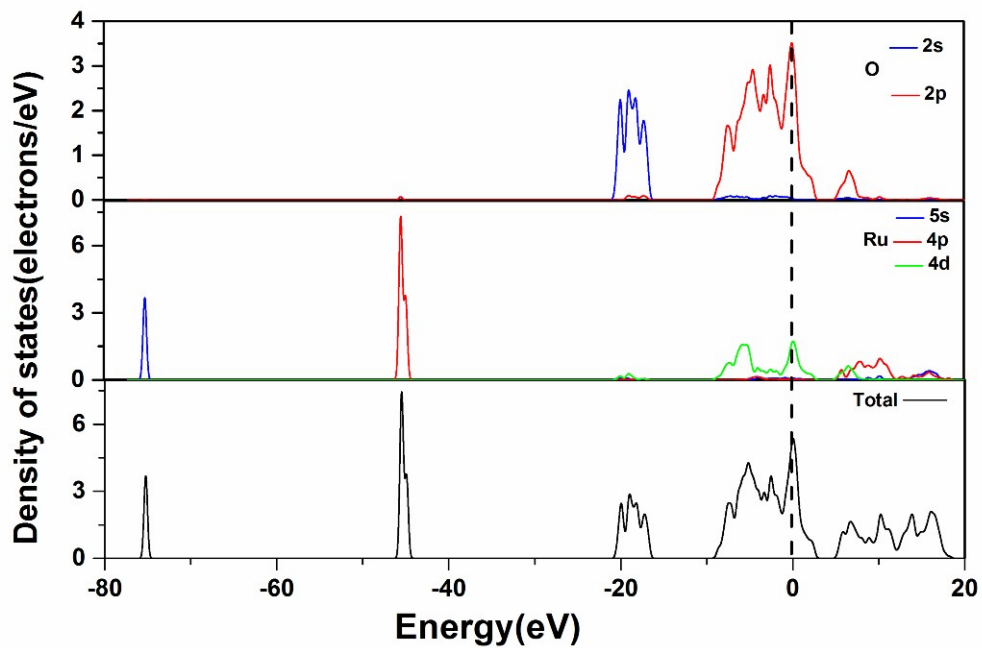

Fig. S5 Band structure (a), and TDOS and PDOS of RuO<sub>2</sub> (b). In the PDOS, blue, red and green lines represent s, p and d orbits, respectively.

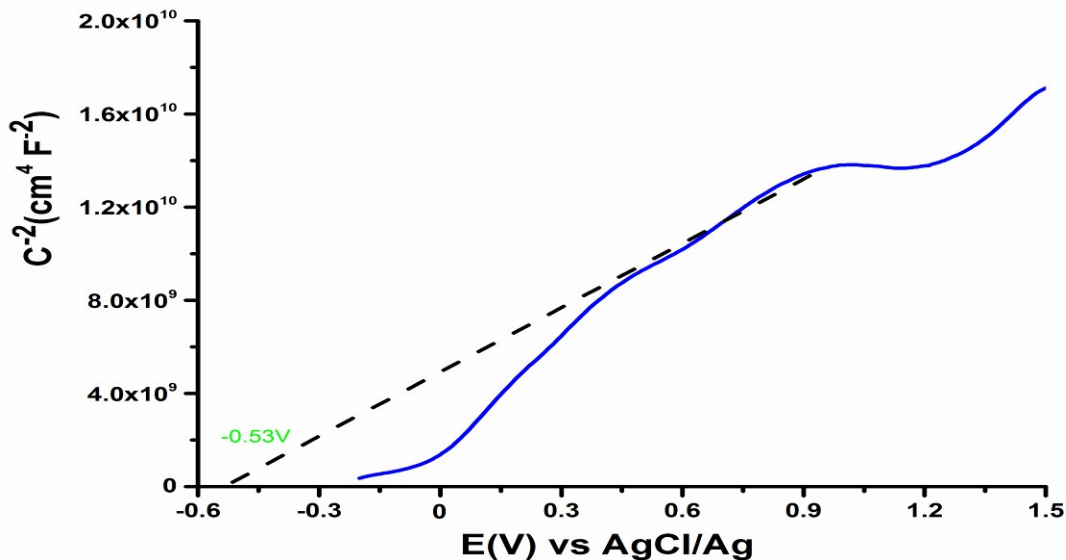

**Fig. S6** Mott–Schottky plot of CP 1 in  $\text{Na}_2\text{SO}_4$  aqueous solution (0.2 M, 50 mL) at the frequency of 1000 Hz in a potential range of -0.6 ~ 1.5 V vs AgCl/Ag (the amplitude of the potential perturbation was 5 mV).

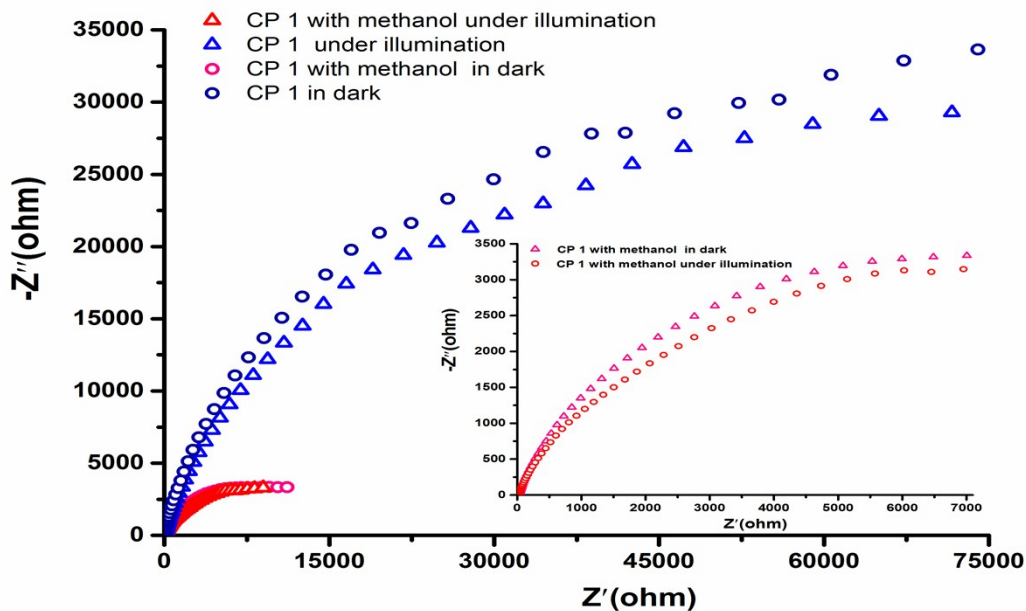

**Fig. S7** Nyquist plots ( $Z'$  vs.  $-Z''$ ) of CP 1 at 0 V vs AgCl/Ag in  $\text{Na}_2\text{SO}_4$  aqueous solution with and without methanol in the absence and presence of visible light illumination ( $\lambda > 420$  nm,  $100 \text{ mW cm}^{-2}$ ).

(a)

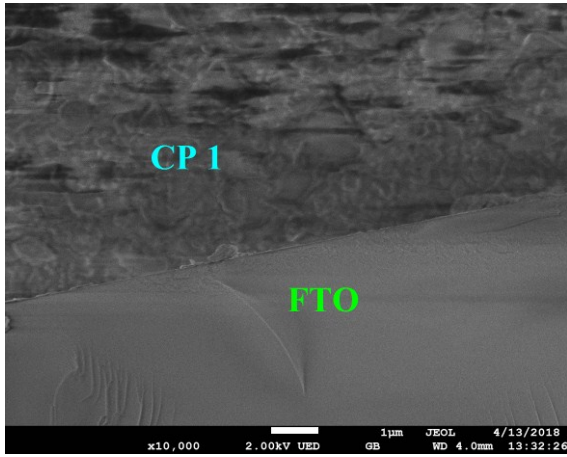

(b)

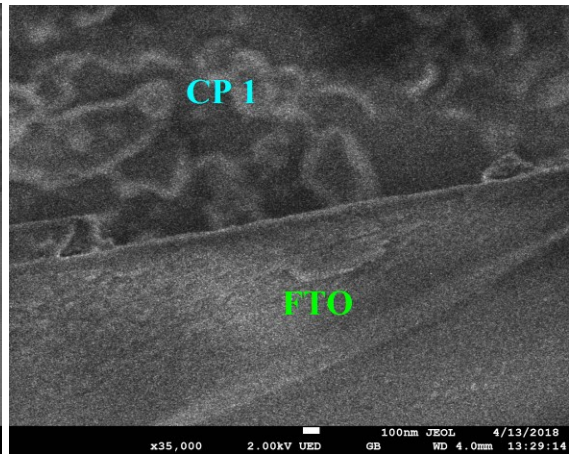

(c)

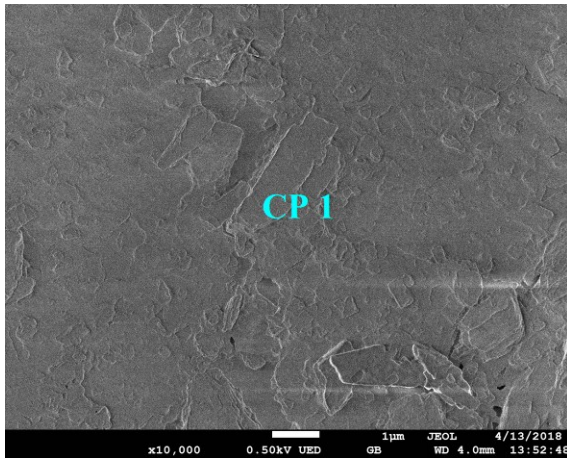

(d)

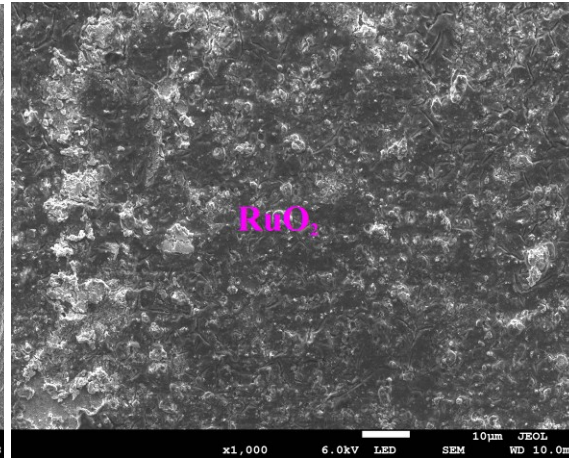

(e)

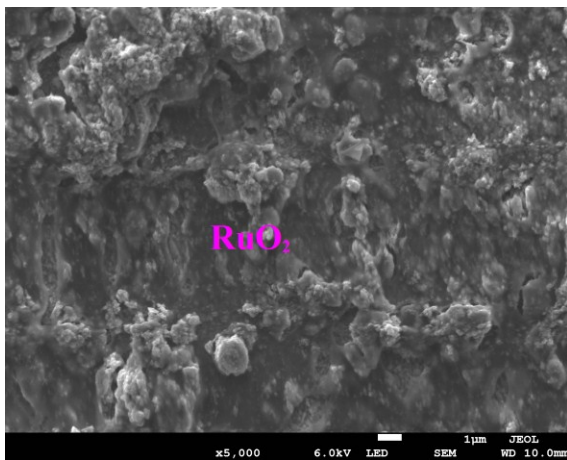

(f)

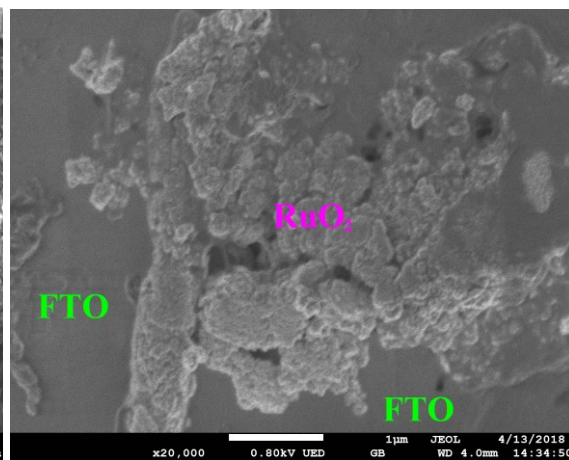

(g)

(h)



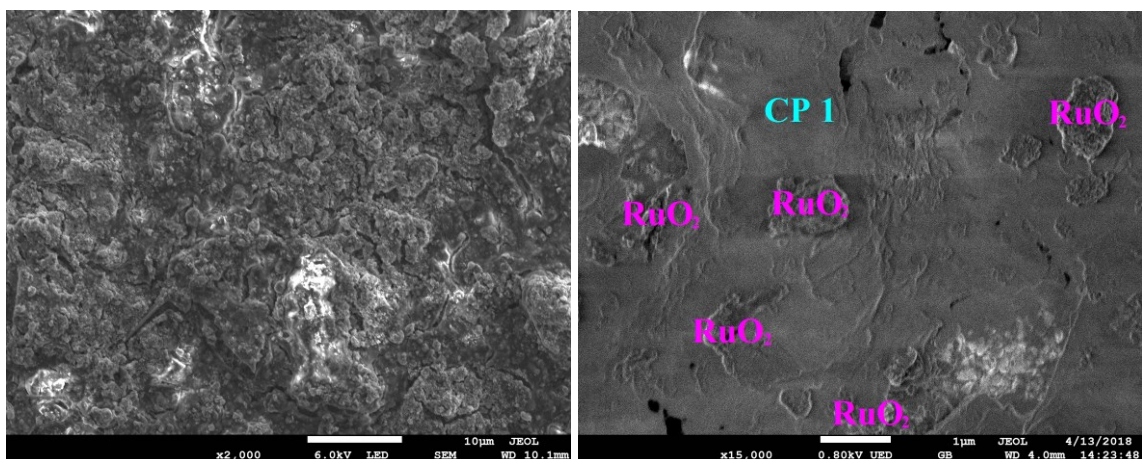

**Fig. S8** SEM images of CP 1-modified FTO (FTO/CP 1) (a-c), RuO<sub>2</sub>-modified FTO (FTO/RuO<sub>2</sub>) (d-f) and FTO/CP 1/RuO<sub>2</sub> (g, h).

(a)

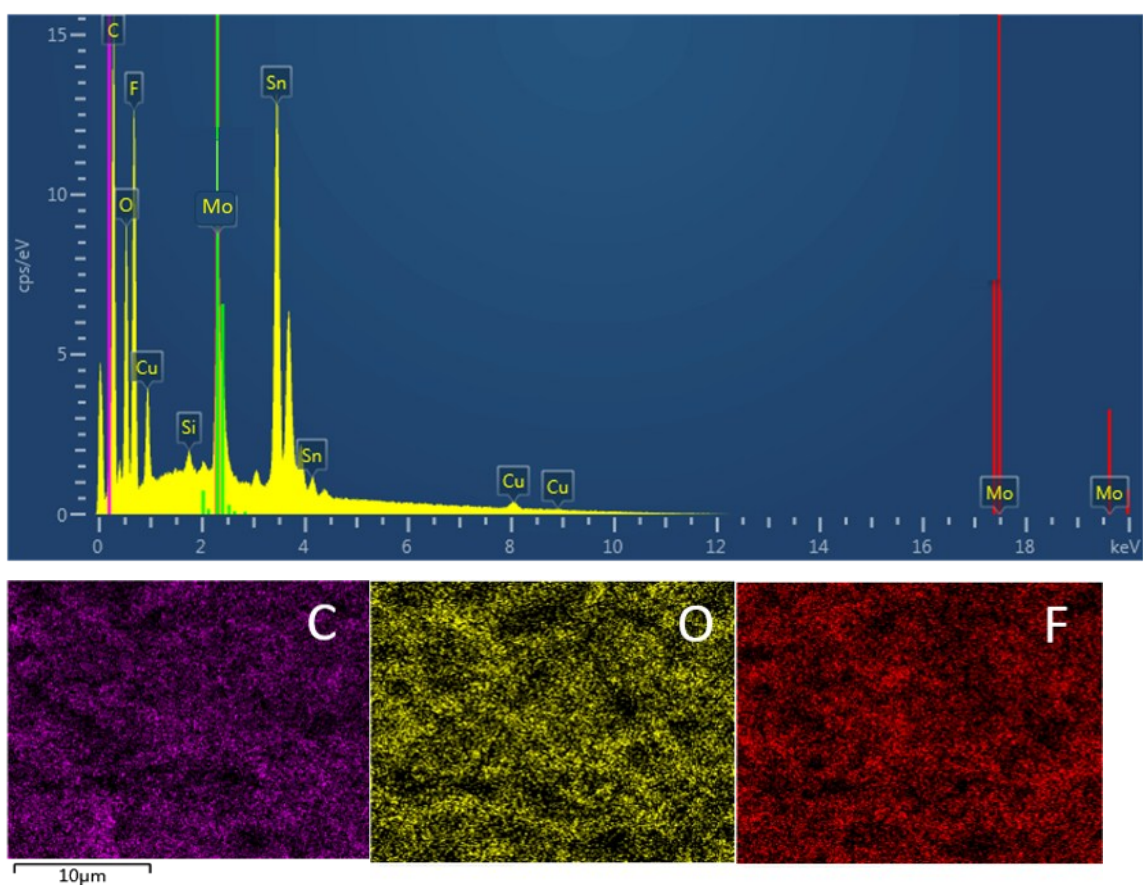

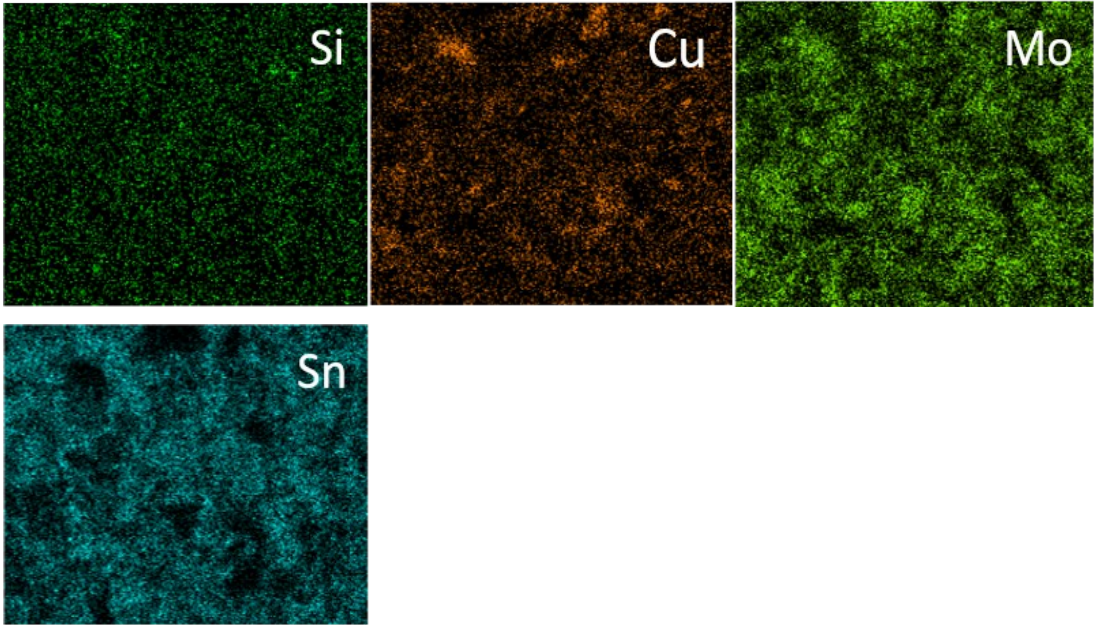

(b)

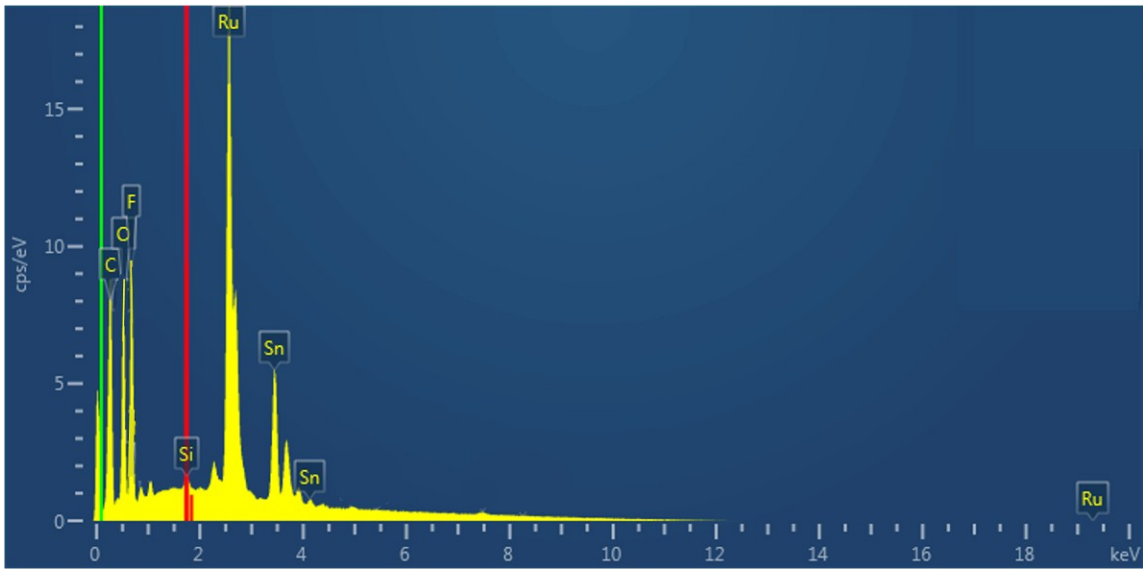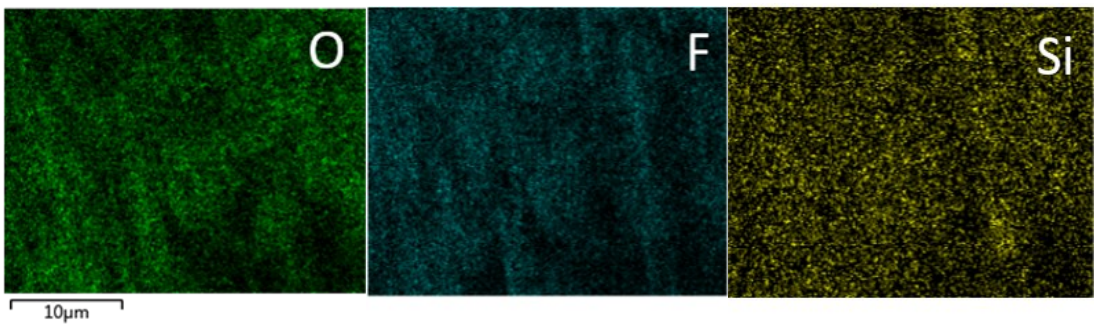

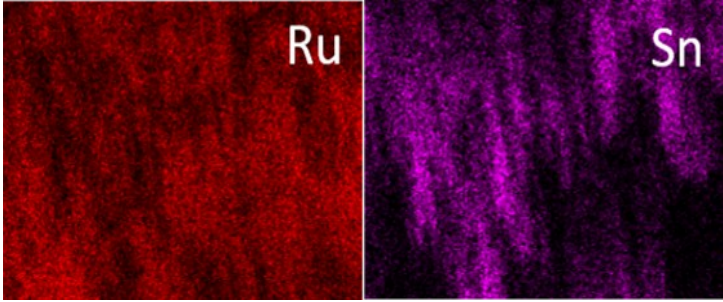

(c)

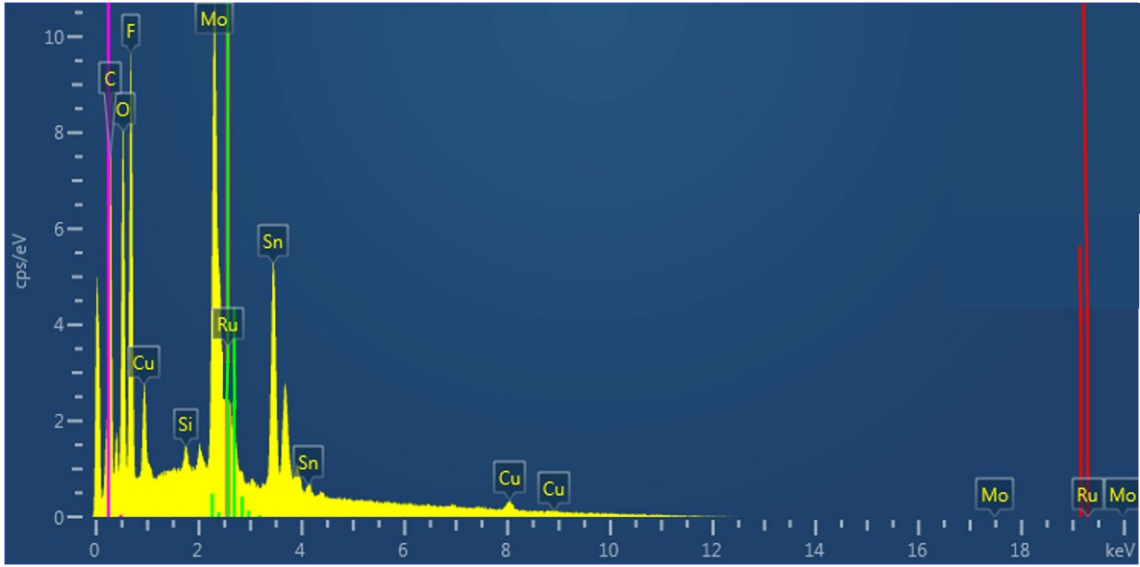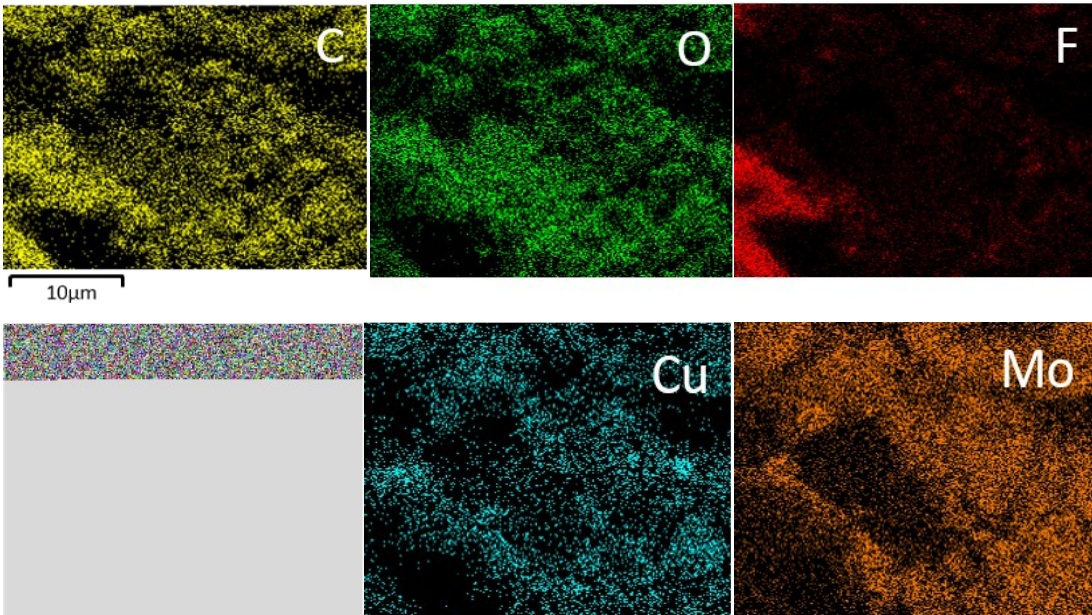

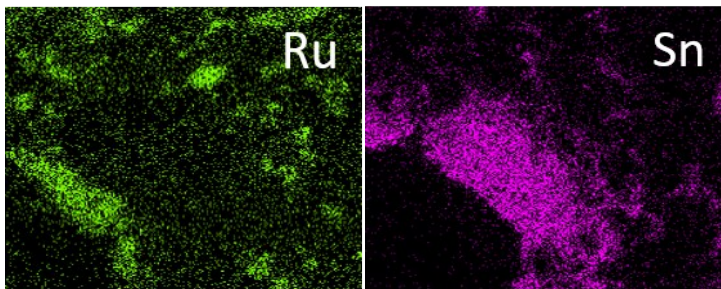

**Fig. S9** EDS and elemental mappings for CP 1-modified FTO (FTO/CP 1) (a), RuO<sub>2</sub>-modified FTO (FTO/RuO<sub>2</sub>) (b) and FTO/CP 1/RuO<sub>2</sub> (c).

**Table S3** The values of the parameters in the equivalent circuits

|                                                            | $R_s/\Omega$ | $R_{ct}/\Omega$ | L/H                    | C/F                   | Q                     |
|------------------------------------------------------------|--------------|-----------------|------------------------|-----------------------|-----------------------|
| RuO <sub>2</sub> with methanol under illumination          | 30.44        | 8.66            | $1.96 \times 10^{-6}$  | $6.11 \times 10^{-6}$ | $4.78 \times 10^{-3}$ |
| FTO/CP 1/RuO <sub>2</sub> in dark                          | 25.25        | 45.47           | $1.62 \times 10^{-17}$ | $4.85 \times 10^{-5}$ | $4.38 \times 10^{-3}$ |
| FTO/CP 1/RuO <sub>2</sub> under illumination               | 25.26        | 39.72           | $1.97 \times 10^{-15}$ | $4.59 \times 10^{-5}$ | $4.36 \times 10^{-3}$ |
| FTO/CP 1/RuO <sub>2</sub> with methanol in dark            | 22.58        | 19.79           | $1.86 \times 10^{-15}$ | $3.70 \times 10^{-5}$ | $4.69 \times 10^{-3}$ |
| FTO/CP 1/RuO <sub>2</sub> with methanol under illumination | 24.27        | 18.75           | $3.01 \times 10^{-23}$ | $4.05 \times 10^{-5}$ | $4.77 \times 10^{-3}$ |

(a)

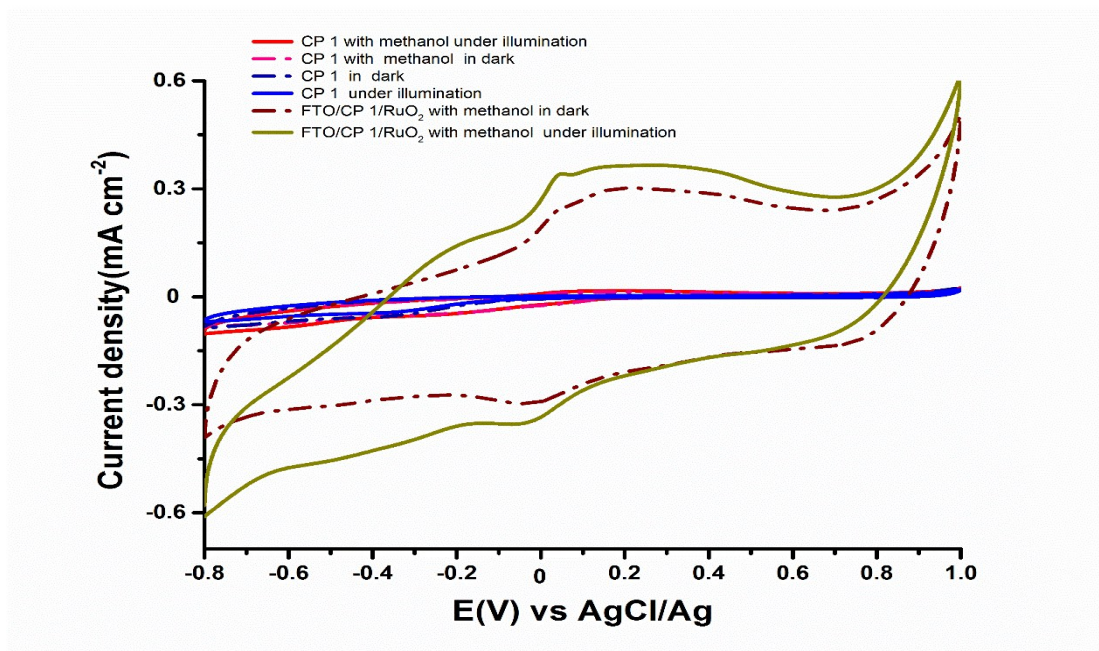

(b)

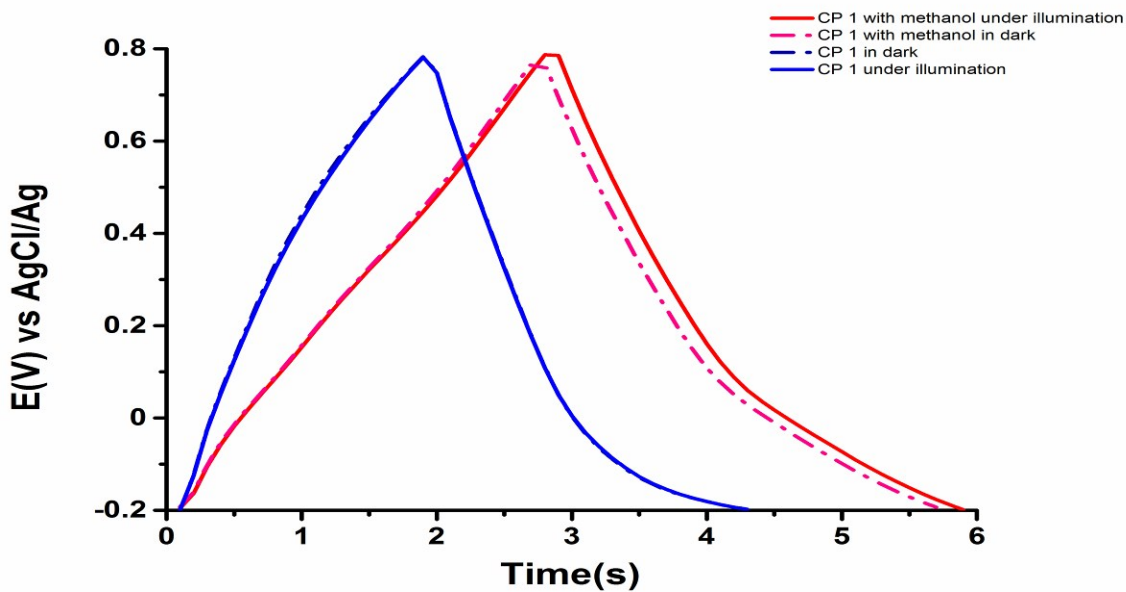

(c)

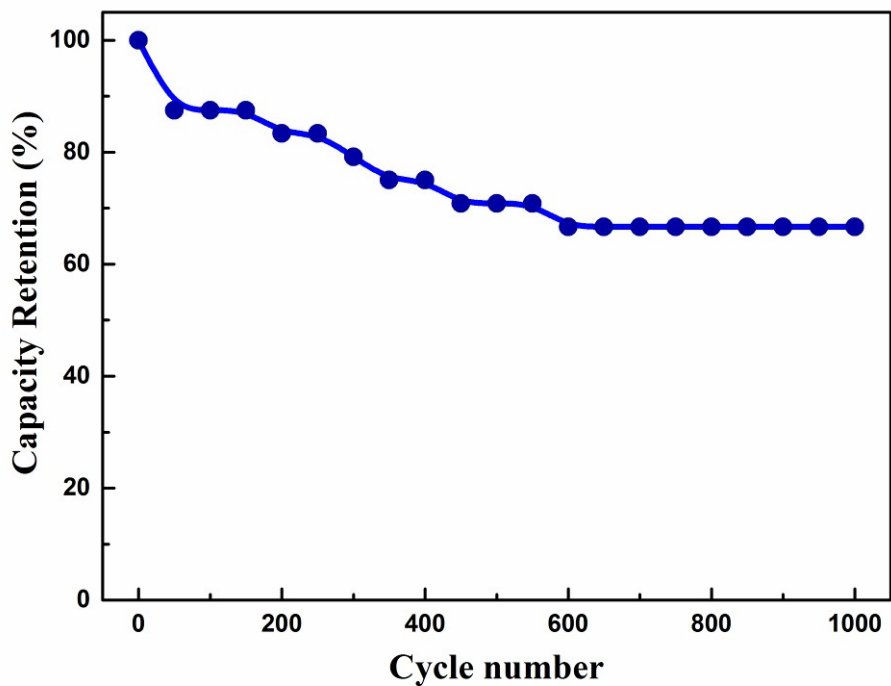

**Fig. S10** Comparison of CVs for FTO/CP 1 and FTO/CP 1/RuO<sub>2</sub> at 0.01 V s<sup>-1</sup> (a) and GCD curves of FTO/CP 1 at 0.1 A g<sup>-1</sup> (b) in the Na<sub>2</sub>SO<sub>4</sub> solution in the absence and presence of methanol with (solid line) and without (dotted line) visible light illumination

( $\lambda > 420$  nm,  $100 \text{ mW cm}^{-2}$ ); 1000 GCD cycles of GCD curves of FTO/CP **1** at  $0.1 \text{ A g}^{-1}$  in the  $\text{Na}_2\text{SO}_4$  solution in dark (c).
